1 **Association of Age-Related Macular Degeneration With Mortality: A Propensity**  
2 **Score-Matched Analysis**

3

4 **Running Title:** AMD and mortality

5

6 **Authors**

7 Yifan Chen, BM BCh<sup>1,2</sup>

8 Yueye Wang, MD<sup>3</sup>

9 Xianwen Shang, PhD<sup>1</sup>

10 Wei Wang, MD PhD<sup>3</sup>

11 Zhuoting Zhu, MD PhD<sup>1</sup>

12

13 **Affiliations**

14 1. Guangdong Eye Institute, Department of Ophthalmology, Guangdong Provincial  
15 People's Hospital, Guangdong Academy of Medical Sciences, Guangzhou, 510080,  
16 China

17 2. John Radcliffe Hospital, Oxford University Hospitals NHS Foundation Trust, Oxford,  
18 UK.

19 3. State Key Laboratory of Ophthalmology, Zhongshan Ophthalmic Center, Sun Yat-sen  
20 University, Guangzhou, China.

21

22 **Word Count:** Abstract, 248; Whole paper, 1789.

23 **Tables:** 2

24

25 **Corresponding Author**

26 Zhuoting Zhu, MD PhD

27 Email: [zhuoting\\_zhu@hotmail.com](mailto:zhuoting_zhu@hotmail.com)

28 Wei Wang, MD PhD

29 Email: zoc\_wangwei@yahoo.com

30

### 31 **Synopsis**

32 Late macular degeneration independently predicted higher cardiovascular disease mortality.  
33 Any, early and late age-related macular degeneration were associated with higher all-cause  
34 mortality and mortality due to causes other than cardiovascular disease or cancer.

35

### 36 **Abstract**

37 **Purpose:** To investigate the association between age-related macular degeneration (AMD)  
38 and 10-year all-cause and cause-specific mortality using a large-scale population-based  
39 sample.

40 **Methods:** Data from the 2005-2008 cycles of the National Health and Nutrition  
41 Examination Survey were used to assess the risk of mortality in relation to AMD in a  
42 propensity score-matched cohort. AMD status was assessed by retinal images with the  
43 standardized grading scheme. Mortality data until 31st December 2015 were derived from  
44 mortality archives. Cox proportional hazards regression models were used to estimate  
45 hazard ratios (HRs) and 95% confidence intervals (CIs) for survival.

46 **Results:** A total of 4691 participants were included. After a median follow-up of 8.42 (IQR:  
47 7.58-9.67) years, 698 participants died. Participants with any AMD had an increased risk of  
48 all-cause mortality (HR, 2.02; 95% CI, 1.37-2.98). Similar results were observed for early  
49 (HR, 1.93; 95% CI, 1.31-2.85) and late AMD (HR, 4.29; 95% CI, 2.10-8.79). For  
50 cause-specific mortality, any (HR, 2.17; 95% CI, 1.39-3.39), early (HR, 2.18; 95% CI,  
51 1.36-3.51), and late AMD (HR, 3.95; 95% CI, 1.65-9.46) were associated with significantly  
52 higher mortality due to causes other than cardiovascular disease (CVD) or cancer. Late  
53 AMD independently predicted a higher risk of CVD mortality (HR, 2.48; 95% CI,  
54 1.32-4.65).

55 **Conclusions:** The current study showed that any, early, and late AMD were associated  
56 with increased risks of all-cause mortality and mortality due to causes other than CVD or  
57 cancer. In addition, we found that late AMD was associated with increased risks of CVD

58 mortality.

59

60

61 **Keywords:** age-related macular degeneration, all-cause mortality, cause-specific mortality.

62

63

64

65

66

67

68

69

70

71

72

73

74

75

76

77

78

79

80

81

82

83

84

85

86

87

88

## 89 **Introduction**

90 Age-related macular degeneration (AMD) is one of the leading causes of visual impairment  
91 and blindness worldwide.<sup>1</sup> The number of people with AMD globally is projected to  
92 increase to 288 million in 2040.<sup>2</sup> In the United States, the number of people with AMD is  
93 estimated to reach 2.95 million in 2020.<sup>3</sup> As the population ages, the prevalence of AMD is  
94 likely to increase further, leading to significant economic and societal costs.<sup>4</sup>

95

96 Accumulating evidence has suggested that AMD is an independent risk factor for all-cause  
97 mortality.<sup>5-10</sup> However, the results for its association with cause-specific mortality remain  
98 inconsistent.<sup>11-20</sup> Some studies have reported that AMD was associated with an increased  
99 risk of CVD mortality,<sup>5,6,8</sup> while others did not find any significant association between  
100 AMD and CVD mortality.<sup>11,12,19</sup> Investigators have previously hypothesized that the similar  
101 risk profile shared by AMD and CVD<sup>21-23</sup>, as well as the potential thromboembolic events  
102 secondary to intravitreal anti-vascular endothelial growth factor (anti-VEGF) treatment<sup>24,25</sup>  
103 may increase the risk of CVD mortality among patients with AMD.

104

105 Our previous study published in 2018 found that only late AMD increased the risk of  
106 5-year all-cause and non-CVD non-cancer mortality, while no significant association was  
107 found between AMD and CVD mortality using data from the National Health and Nutrition  
108 Examination Survey (NHANES).<sup>26</sup> The availability of 10-year mortality data empowers us  
109 with longer follow-up and more statistical power to investigate the long-term mortality  
110 among patients with AMD.

111

112 The propensity score reflects the probability of being exposed based on baseline  
113 covariates<sup>27</sup>. As a popular method used for controlling confounders, propensity score  
114 matching works with prevalence in giving unbiased estimate in observational studies with  
115 multiple covariates and rare outcome<sup>28,29</sup>. Thus, in this study, propensity score matching  
116 was employed instead of conventional parsimonious regression models by matching  
117 participants with similar distribution of confounders, to maximum eliminate potential bias.

118

119 Therefore, we aim to investigate the association of AMD with 10-year all-cause and  
120 cause-specific mortality using a propensity score-matched method.

121

## 122 **Methods**

### 123 **Sample and Population**

124 The NHANES is conducted by the National Center for Health Statistics (NCHS) of the  
125 Centers for Disease Control and Prevention. It uses stratified multistage sampling methods,  
126 described in detail elsewhere.<sup>30</sup> Briefly, all participants completed health-related interviews  
127 and examinations in each cycle of the NHANES, which was conducted every two years. In  
128 this survey analysis, we analyzed data from the 2005-2008 cycles of the NHANES.  
129 NHANES protocols were reviewed and approved by the NCHS research ethics review  
130 committee and all participants provided written informed consent.

131

### 132 **AMD Identification**

133 During the 2005-2008 cycles of NHANES, retinal images were collected from participants  
134 aged 40 years and older using an ophthalmic digital imaging system (CR6-45NM; Canon  
135 USA, Inc) and digital camera (EOS 10D; Canon USA, Inc). Fundus images were graded at  
136 the University of Wisconsin, Madison, according to the modified Wisconsin Age-Related  
137 Maculopathy Grading Classification Scheme.<sup>31,32</sup> Early AMD was defined as signs of  
138 drusen with a grid area of more than a 500  $\mu\text{m}$  circle and/or pigmentary abnormalities. Late  
139 AMD was defined as the presence of exudative or geographic atrophy signs. The AMD  
140 status was decided based on the more severely affected eye.

141

### 142 **Mortality Data**

143 Mortality data were derived from the 2020 public-access linked mortality archives.<sup>33</sup> The  
144 International Statistical Classification of Diseases and Related Health Problems, Tenth  
145 Revision (ICD-10) codes were used to determine causes of deaths. Codes I00 to I09, I11,  
146 I13, and I20 to I51 (diseases of heart) and I60 to I69 (cerebrovascular disease) were defined  
147 as death attributable to CVD. ICD-10 codes C00 to C97 were defined as cancer mortality.

148 Any other causes of death were considered death due to causes other than CVD or cancer.  
149 Participants were considered alive if not matched with death certificates. Time to death was  
150 counted from baseline to date of death or the 31<sup>st</sup> of December, 2015, whichever came first.

151

### 152 **Confounding Variables**

153 Information on demographics, health-related behaviors, and other characteristics was  
154 collected by in-person interviews and examinations. The confounding variables considered  
155 in this analysis include age, gender, ethnicity, education, marital status, family income,  
156 smoking status, alcohol consumption, diabetes mellitus, hypertension, high cholesterol,  
157 body mass index, C-reactive protein level, walking disability, self-rated health status,  
158 depressive symptoms, coexisting ocular diseases, history of cardiovascular diseases and  
159 history of cancer. Details on how these confounding variables were determined were  
160 described in a previous paper.<sup>26,34-37</sup> The exclusion on confounding factors was done if any  
161 one of the factors were missing.

162

### 163 **Statistical Analysis**

164 Data from the 2005-2006 and 2007-2008 cycles of NHANES were combined and analysed  
165 accounting for the complex and stratified designed based on the NHANES analytic and  
166 reporting guidelines.<sup>38</sup> In the present analysis, we assessed the risk of mortality in relation  
167 to AMD in a propensity score-matched cohort. Logistic regression models were used to  
168 create the propensity score and the balance of covariates in models was tested. Inverse  
169 probability of treatment weighting method based on the synthesized propensity score was  
170 used to match participants with and without AMD. Unpaired t-test and design-adjusted  
171 Rao-Scott Pearson  $\chi^2$  test were used for the comparison of continuous and categorical  
172 variables, respectively. Hazard ratios (HRs) and their 95% confidence interval (95% CI)  
173 were estimated by Cox proportional hazards regression models. Sensitivity analyses that  
174 excluding the participants with cancer at baseline were further performed to validate the  
175 robustness of our findings. All analyses were carried out in Stata (Version 14; Stata Corp,  
176 College Station, TX). A P value of less than 0.05 was considered to be significant.

177

178 **Results**

179 **Study Population**

180 After excluding 1193 participants who had missing information on the AMD status and/or  
181 survival status, and 913 participants who had missing information on confounding factors,  
182 4691 participants were identified. Excluded participants were more likely to be elderly, of  
183 female gender, non-Hispanic black and other ethnicities, lower educational level,  
184 unmarried status, below poverty line, and lifetime abstainer/former drinker. They also  
185 tended to have comorbidities history, coexisting ocular diseases, walking disability, and  
186 poorer general health status (Supplement Table 1).

187

188 There were 360 participants with AMD and 4331 participants without AMD. There was no  
189 significant difference in baseline characteristics between AMD and non-AMD participants  
190 after propensity score matching (Table 1).

191

192 **All-cause mortality**

193 After a median duration of 8.42 (IQR: 7.58-9.67) years, a total of 698 participants died  
194 from all causes. After adjustments for confounding factors, the Cox proportional hazards  
195 regression model indicated that any AMD was associated with increased all-cause mortality  
196 (HR, 2.02; 95% CI, 1.37-2.98). Early AMD (HR, 1.93; 95% CI, 1.31-2.85) and late AMD  
197 (HR, 4.29; 95% CI, 2.10-8.79) were also associated with significantly higher all-cause  
198 mortality compared to the group without AMD.

199

200 **Cause-specific mortality**

201 Of all deaths, 129, 164, and 405 were attributable to CVD, cancer, and non-CVD  
202 non-cancer causes, respectively. After multiple adjustments, Cox proportional hazards  
203 regression model showed that any AMD (HR, 2.17; 95% CI, 1.39-3.39), early AMD (HR,  
204 2.18; 95% CI, 1.36-3.51) and late AMD (HR, 3.95; 95% CI, 1.65-9.46) were significantly  
205 associated with higher risks of mortality due to causes other than CVD or cancer. In the  
206 fully adjusted model, we found that late AMD independently predicted a higher risk of  
207 CVD mortality (HR, 2.48; 95% CI, 1.32-4.65).

208

### 209 **Sensitivity analysis**

210 Sensitivity analyses that excluding the participants with cancer at baseline were further  
211 performed to validate the robustness of our findings. Similar results were noted  
212 (Supplement Table 2).

213

### 214 **Discussion**

215 The present study showed that any, early and late AMD were significantly associated with  
216 increased risks of all-cause mortality and mortality due to causes other than CVD or cancer,  
217 which was consistent with our previous study<sup>26</sup> with a 5-year follow-up duration. In  
218 addition, we found that late AMD is associated with increased CVD mortality.

219

220 Consistent evidence on the association between late AMD and increased risks of all-cause  
221 mortality has been reported.<sup>6,12,26,39,40</sup> Whereas conflicting results were found on the  
222 associations of early or any AMD with all-cause mortality.<sup>6-8,11-13,15,17,20,39</sup> These conflicting  
223 results might be due to the heterogeneity in the study population, detection of AMD,  
224 statistical methods, and confounding factors adjusted for. The present analysis indicated  
225 that any form of AMD was associated with increased risks of mortality, suggesting the  
226 presence of AMD might be a biomarker of ageing and frailty. Even though the exact  
227 mechanism for the significant association between AMD and mortality remains unclear,  
228 growing evidence has indicated some common pathways shared between the ageing  
229 process and the pathogenesis of AMD, such as increased oxidative stress and chronic  
230 inflammation.<sup>41-43</sup>

231

232 The present study found that participants with late AMD had significantly higher CVD  
233 mortality. Growing evidence has demonstrated a close relationship between AMD and  
234 increased CVD mortality.<sup>5,6,8,11,12,34,44</sup> Two recent systematic reviews found that late AMD  
235 was significantly associated with increased CVD mortality with an estimated HR of 1.46  
236 and 1.28 respectively.<sup>39,40</sup> The association between late AMD and CVD mortality might be  
237 explained by their common pathogenesis pathways (e.g., local inflammation and oxidative



238 stress) and risk factors (e.g., age and smoking).<sup>35,45,46</sup> The ‘hallmark’ of AMD, drusen,  
239 closely resembled atherosclerotic plaques in composition.<sup>46</sup> In addition, the use of  
240 anti-VEGF to treat neovascular AMD might also increase CVD risks leading to higher  
241 CVD mortality.<sup>24,25,47,48</sup>

242

243 Consistent with previous studies,<sup>10,11</sup> we also found a strong association between AMD and  
244 non-CVD non-cancer mortality. Several hypotheses may explain this. Firstly, participants  
245 with AMD may be more generally frail. Secondly, increasing evidence suggested that AMD  
246 was significantly associated with neurodegenerative diseases (e.g., Alzheimer’s  
247 disease).<sup>49-51</sup> Last but not least, participants with AMD might be more likely to suffer from  
248 functional disabilities and social deprivation due to impaired vision.<sup>52-54</sup>

249

250 The present study has the advantage of a large-scale nationally sample, long-term  
251 follow-up and the use of propensity score matching method to eliminate confounding  
252 effects, which could fairly imitate the settings of random clinical trials. Moreover, the high  
253 consistency among results of the multiple sensitivity analyses and the primary analysis  
254 strongly supported the validity of our findings. Several limitations should be considered.  
255 Firstly, the relatively small number of participants with late AMD preventing us from  
256 conducting further subgroup analyses. Large-scale studies are needed to corroborate our  
257 findings. Secondly, the AMD status being assessed at a single time point, the consecutive  
258 trend could only be inferred. Thirdly, though we have included and matched most of the  
259 previously established confounders, less precise estimates from propensity scores may be  
260 drawn due to potential unmatched baseline characteristics. Last but not the least, the  
261 differences in baseline characteristics between excluded participants and included  
262 participants might bias the AMD-mortality associations.

263

## 264 **Conclusion**

265 In summary, the present study showed that any, early, and late AMD were associated with  
266 increased risks of all-cause mortality and mortality due to causes other than CVD or cancer.  
267 Furthermore, we also found that late AMD independently predicted a higher risk of CVD

268 mortality. Our results highlight the importance of early detection and management of AMD  
 269 as this helps to identify the vulnerable group of patients who have increased long-term  
 270 mortality.

271

272 Table 1. Characteristics of Participants With And Without AMD in Propensity Score-Matched Cohorts.

| Characteristics            | No. (%)     |            | P Value <sup>a</sup> |
|----------------------------|-------------|------------|----------------------|
|                            | Non-AMD     | AMD        |                      |
| Age, yrs                   |             |            |                      |
| 40-49                      | 1263 (34.9) | 24 (43.5)  | 0.312                |
| 50-59                      | 1100 (31.0) | 39 (24.2)  |                      |
| 60-69                      | 1084 (18.6) | 80 (17.8)  |                      |
| 70-79                      | 644 (11.2)  | 107 (9.64) |                      |
| ≥80                        | 240 (4.33)  | 110 (4.94) |                      |
| Gender                     |             |            |                      |
| Male                       | 2185 (48.0) | 187 (52.5) | 0.408                |
| Female                     | 2146 (52.0) | 173 (47.5) |                      |
| Race                       |             |            |                      |
| Non-Hispanic white         | 2347 (78.4) | 258 (84.7) | 0.050                |
| Non-Hispanic black         | 871 (8.96)  | 31 (4.29)  |                      |
| Mexican American           | 689 (5.32)  | 42 (5.90)  |                      |
| Other                      | 424 (7.32)  | 29 (5.16)  |                      |
| Education                  |             |            |                      |
| Less than high school      | 1210 (17.1) | 100 (17.1) | 0.996                |
| High school and over       | 3121 (82.9) | 260 (82.9) |                      |
| Marital status             |             |            |                      |
| Unmarried and other        | 1481 (30.2) | 169 (23.6) | 0.142                |
| Married/with a partner     | 2850 (69.8) | 191 (76.4) |                      |
| Poverty income ratio (PIR) |             |            |                      |
| Below poverty (<1)         | 640 (8.46)  | 55 (7.57)  | 0.723                |

|                                   |             |            |       |
|-----------------------------------|-------------|------------|-------|
| At or above poverty ( $\geq 1$ )  | 3691 (91.5) | 305 (92.4) |       |
| Smoking status                    |             |            |       |
| Never                             | 2057 (48.7) | 164 (41.5) | 0.292 |
| Former                            | 1376 (30.9) | 145 (39.7) |       |
| Current                           | 898 (20.4)  | 51 (18.8)  |       |
| Alcohol consumption               |             |            |       |
| Lifetime abstainer/former drinker | 1025 (19.8) | 100 (17.4) | 0.588 |
| Current drinker                   | 2362 (55.5) | 185 (60.5) |       |
| ( $\leq 3$ drinks/w)              |             |            |       |
| Current drinker                   | 944 (24.7)  | 75 (22.1)  |       |
| (> 3 drinks/w)                    |             |            |       |
| Diabetes mellitus                 |             |            |       |
| No                                | 3535 (87.0) | 299 (89.7) | 0.296 |
| Yes                               | 796 (13.0)  | 61 (10.3)  |       |
| Hypertension                      |             |            |       |
| No                                | 2243 (56.7) | 123 (62.1) | 0.440 |
| Yes                               | 2088 (43.3) | 237 (37.9) |       |
| High cholesterol                  |             |            |       |
| No                                | 2653 (62.8) | 214 (58.4) | 0.468 |
| Yes                               | 1678 (37.2) | 146 (41.6) |       |
| BMI                               |             |            |       |
| <18.5 kg/m <sup>2</sup>           | 62 (1.30)   | 3 (0.21)   | 0.103 |
| 18.5-30.0 kg/m <sup>2</sup>       | 2594 (61.8) | 249 (68.6) |       |
| $\geq 30.0$ kg/m <sup>2</sup>     | 1675 (36.9) | 108 (31.2) |       |
| High C-reactive protein           |             |            |       |
| No                                | 3839 (89.6) | 315 (92.6) | 0.317 |
| Yes                               | 492 (10.4)  | 45 (7.40)  |       |
| Depressive symptom                |             |            |       |
| No                                | 3967 (93.0) | 337 (90.6) | 0.509 |

|                                     |             |            |       |
|-------------------------------------|-------------|------------|-------|
| Yes                                 | 364 (7.05)  | 23 (9.40)  |       |
| Coexisting ocular diseases          |             |            |       |
| No                                  | 3334 (81.5) | 204 (84.0) | 0.450 |
| Yes                                 | 997 (18.5)  | 156 (16.0) |       |
| Walking disability                  |             |            |       |
| No                                  | 3950 (92.8) | 300 (91.6) | 0.532 |
| Yes                                 | 381 (7.20)  | 60 (8.44)  |       |
| Self-rated health                   |             |            |       |
| Poor/Fair                           | 1054 (17.6) | 92 (17.1)  | 0.896 |
| Good/Excellent                      | 3277 (82.4) | 268 (82.9) |       |
| History of congestive heart failure |             |            |       |
| No                                  | 4156 (97.0) | 339 (94.2) | 0.314 |
| Yes                                 | 175 (3.02)  | 21 (5.76)  |       |
| History of heart attack             |             |            |       |
| No                                  | 4094 (95.4) | 322 (92.9) | 0.424 |
| Yes                                 | 237 (4.58)  | 38 (7.10)  |       |
| History of stroke                   |             |            |       |
| No                                  | 4157 (96.3) | 315 (96.5) | 0.802 |
| Yes                                 | 174 (3.71)  | 45 (3.46)  |       |
| History of cancer                   |             |            |       |
| No                                  | 3818 (88.2) | 294 (91.4) | 0.198 |
| Yes                                 | 513 (11.8)  | 66 (8.56)  |       |

Abbreviations: AMD, age-related macular degeneration; BMI, body mass index.

<sup>a</sup> All P values were calculated using the design-adjusted Rao-Scott Pearson  $\chi^2$  test for categorical variables.

273

274

275 Table 2. Risk for All-Cause Mortality and Specific-Cause Mortality in Participants With AMD Compared With Non-AMD After Propensity Score Matching

|            | All-Cause Mortality |                          | CVD Mortality |                          | Cancer Mortality |                               | Non-CVD/Non-cancer Mortality |                          |
|------------|---------------------|--------------------------|---------------|--------------------------|------------------|-------------------------------|------------------------------|--------------------------|
|            | Events/Number       | HR (95% CI) <sup>a</sup> | Events/Number | HR (95% CI) <sup>a</sup> | Events/Number    | HR (95% CI) <sup>a</sup>      | Events/Number                | HR (95% CI) <sup>a</sup> |
| AMD status |                     |                          |               |                          |                  |                               |                              |                          |
| No AMD     | 571/4331            | Reference                | 110/4331      | Reference                | 142/4331         | Reference                     | 319/4331                     | Reference                |
| Any AMD    | 127/360             | <b>2.02 (1.37-2.98)</b>  | 19/360        | 1.42 (0.69-2.92)         | 22/360           | 1.42 (0.72-2.82)              | 86/360                       | <b>2.17 (1.39-3.39)</b>  |
| Early AMD  | 104/318             | <b>1.93 (1.31-2.85)</b>  | 15/318        | 1.27 (0.58-2.82)         | 20/318           | 1.45 (0.73-2.89)              | 69/318                       | <b>2.18 (1.36-3.51)</b>  |
| Late AMD   | 23/42               | <b>4.29 (2.10-8.79)</b>  | 4/42          | <b>2.48 (1.32-4.65)</b>  | 2/42             | 0.44 (0.06-3.27) <sup>b</sup> | 17/42                        | <b>3.95 (1.65-9.46)</b>  |

Abbreviations: AMD, age-related macular degeneration; CVD, cardiovascular disease; CI, confidence interval; HR, hazard ratio.

<sup>a</sup> Adjusted for age, gender, race, education, marital status, family income, smoking status, alcohol consumption, diabetes mellitus, hypertension, high cholesterol, BMI, high CRP, depressive symptom, coexisting ocular diseases, walking disability, self-rated health, history of cardiovascular diseases, and cancer.

<sup>b</sup> Adjusted for age and gender.

Boldface indicates statistical significance.

276

277

278

## **Acknowledgement**

1) **Funding Support:** The present work was supported by the Fundamental Research Funds of the State Key Laboratory of Ophthalmology, National Natural Science Foundation of China (82000901, 82101173), Project of Investigation on Health Status of Employees in Financial Industry in Guangzhou, China (Z012014075), Science and Technology Program of Guangzhou, China (202002020049), the Research Foundation of Medical Science and Technology of Guangdong Province (B2021237). The sponsor or funding organization had no role in the design or conduct of this research.

2) **Financial Disclosures:** None.

3) **Other Acknowledgement:** None.

## **Author Contributions:**

Study concept and design: Yifan Chen, Wei Wang, Zhuoting Zhu;

Acquisition, analysis, or interpretation: Xianwen Shang, Wei Wang, Zhuoting Zhu;

Drafting of the manuscript: Yifan Chen, Yueye Wang;

Critical revision of the manuscript for important intellectual content: Xianwen Shang, Wei Wang, Zhuoting Zhu;

Statistical analysis: Xianwen Shang, Wei Wang, Zhuoting Zhu;

Obtained funding: Wei Wang, Zhuoting Zhu;

Administrative, technical, or material support: Wei Wang, Zhuoting Zhu;

Study supervision: Xianwen Shang, Wei Wang, Zhuoting Zhu;

## **Abbreviations and Acronyms:**

AMD = age-related macular degeneration; anti-VEGF = anti-vascular endothelial growth factor; NHANES = National Health and Nutrition Examination Survey; NCHS = National Center for Health Statistics; ICD-10 = International Statistical Classification of Diseases and Related Health Problems, Tenth Revision; HR = Hazard ratios; CI = confidence interval.

## Reference :

1. Flaxman SR, Bourne RRA, Resnikoff S, et al. Global causes of blindness and distance vision impairment 1990-2020: a systematic review and meta-analysis. *Lancet Glob Health*. 2017;5(12):e1221-e1234.
2. Wong WL, Su X, Li X, et al. Global prevalence of age-related macular degeneration and disease burden projection for 2020 and 2040: a systematic review and meta-analysis. *Lancet Glob Health*. 2014;2(2):e106-116.
3. Common Eye Disorders | Basics | VHI | CDC. <https://www.cdc.gov/visionhealth/basics/ced/index.html> (2019).
4. Brown MM, Brown GC, Lieske HB, Tran I, Turpcu A, Colman S. Societal Costs Associated with Neovascular Age-Related Macular Degeneration in the United States. *Retina*. 2016;36(2):285-298.
5. Clemons TE, Kurinij N, Sperduto RD, Group AR. Associations of mortality with ocular disorders and an intervention of high-dose antioxidants and zinc in the Age-Related Eye Disease Study: AREDS Report No. 13. *Arch Ophthalmol*. 2004;122(5):716-726.
6. Fisher DE, Jonasson F, Eiriksdottir G, et al. Age-related macular degeneration and mortality in community-dwelling elders: the age, gene/environment susceptibility Reykjavik study. *Ophthalmology*. 2015;122(2):382-390.
7. Buch H, Vinding T, la Cour M, Jensen GB, Prause JU, Nielsen NV. Risk factors for age-related maculopathy in a 14-year follow-up study: the Copenhagen City Eye Study. *Acta Ophthalmol Scand*. 2005;83(4):409-418.
8. Cugati S, Cumming RG, Smith W, Burlutsky G, Mitchell P, Wang JJ. Visual impairment, age-related macular degeneration, cataract, and long-term mortality: the Blue Mountains Eye Study. *Arch Ophthalmol*. 2007;125(7):917-924.
9. Gangnon RE, Lee KE, Klein BE, Iyengar SK, Sivakumaran TA, Klein R. Effect of the Y402H variant in the complement factor H gene on the incidence and progression of age-related macular degeneration: results from multistate models applied to the Beaver Dam Eye Study. *Arch Ophthalmol*. 2012;130(9):1169-1176.
10. Age-Related Eye Disease Study 2 Research G, Papudesu C, Clemons TE, Agron E, Chew EY. Association of Mortality with Ocular Diseases and Visual Impairment in the Age-Related Eye Disease Study 2: Age-Related Eye Disease Study 2 Report Number 13. *Ophthalmology*. 2018;125(4):512-521.
11. Pedula KL, Coleman AL, Yu F, et al. Age-related macular degeneration and mortality in older women: the study of osteoporotic fractures. *J Am Geriatr Soc*. 2015;63(5):910-917.
12. Gopinath B, Liew G, Burlutsky G, Mitchell P. Age-related macular degeneration and risk of total and cause-specific mortality over 15 years. *Maturitas*. 2016;84:63-67.
13. Siantar RG, Cheng CY, Gemmy Cheung CM, et al. Impact of Visual Impairment and Eye diseases on Mortality: the Singapore Malay Eye Study (SiMES). *Sci Rep*. 2015;5:16304.
14. Knudtson MD, Klein BE, Klein R. Age-related eye disease, visual impairment, and survival: the Beaver Dam Eye Study. *Arch Ophthalmol*. 2006;124(2):243-249.
15. Xu L, Li YB, Wang YX, Jonas JB. Age-related macular degeneration and mortality: the Beijing eye study. *Ophthalmologica*. 2008;222(6):378-379.
16. McCarty CA, Nanjan MB, Taylor HR. Vision impairment predicts 5 year mortality. *Br J*

- Ophthalmol.* 2001;85(3):322-326.
17. Borger PH, van Leeuwen R, Hulsman CA, et al. Is there a direct association between age-related eye diseases and mortality? The Rotterdam Study. *Ophthalmology.* 2003;110(7):1292-1296.
  18. Khanna RC, Murthy GV, Giridhar P, et al. Cataract, visual impairment and long-term mortality in a rural cohort in India: the Andhra Pradesh Eye Disease Study. *PLoS One.* 2013;8(10):e78002.
  19. Thiagarajan M, Evans JR, Smeeth L, Wormald RP, Fletcher AE. Cause-specific visual impairment and mortality: results from a population-based study of older people in the United Kingdom. *Arch Ophthalmol.* 2005;123(10):1397-1403.
  20. Wong TY, Tikellis G, Sun C, Klein R, Couper DJ, Sharrett AR. Age-related macular degeneration and risk of coronary heart disease: the Atherosclerosis Risk in Communities Study. *Ophthalmology.* 2007;114(1):86-91.
  21. Tan JS, Mitchell P, Smith W, Wang JJ. Cardiovascular risk factors and the long-term incidence of age-related macular degeneration: the Blue Mountains Eye Study. *Ophthalmology.* 2007;114(6):1143-1150.
  22. Klein R, Klein BE, Tomany SC, Cruickshanks KJ. The association of cardiovascular disease with the long-term incidence of age-related maculopathy: the Beaver Dam eye study. *Ophthalmology.* 2003;110(4):636-643.
  23. Delcourt C, Michel F, Colvez A, et al. Associations of cardiovascular disease and its risk factors with age-related macular degeneration: the POLA study. *Ophthalmic Epidemiol.* 2001;8(4):237-249.
  24. Pratt NL, Ramsay EN, Kemp A, et al. Ranibizumab and risk of hospitalisation for ischaemic stroke and myocardial infarction in patients with age-related macular degeneration: a self-controlled case-series analysis. *Drug Saf.* 2014;37(12):1021-1027.
  25. Schlenker MB, Thiruchelvam D, Redelmeier DA. Intravitreal anti-vascular endothelial growth factor treatment and the risk of thromboembolism. *Am J Ophthalmol.* 2015;160(3):569-580 e565.
  26. Zhu Z, Wang W, Keel S, Zhang J, He M. Association of Age-Related Macular Degeneration With Risk of All-Cause and Specific-Cause Mortality in the National Health and Nutrition Examination Survey, 2005 to 2008. *JAMA Ophthalmol.* 2019;137(3):248-257.
  27. Austin PC. An Introduction to Propensity Score Methods for Reducing the Effects of Confounding in Observational Studies. *Multivariate Behav Res.* 2011;46(3):399-424.
  28. Benedetto U, Head SJ, Angelini GD, Blackstone EH. Statistical primer: propensity score matching and its alternatives. *Eur J Cardiothorac Surg.* 2018;53(6):1112-1117.
  29. Elze MC, Gregson J, Baber U, et al. Comparison of Propensity Score Methods and Covariate Adjustment: Evaluation in 4 Cardiovascular Studies. *J Am Coll Cardiol.* 2017;69(3):345-357.
  30. Centers for Disease Control and Prevention, National Center for Health Statistics. National Health and Nutrition Examination Survey Data. Hyattsville, MD: US Department of Health and Human Services, Centers for Disease Control and Prevention; 2005. Available at: <http://www.cdc.gov/nchs/nhanes.htm>. Accessed February 11, 2018.
  31. Klein R, Davis MD, Magli YL, Segal P, Klein BE, Hubbard L. The Wisconsin age-related maculopathy grading system. *Ophthalmology.* 1991;98(7):1128-1134.
  32. Klein R, Klein BE, Jensen SC, Mares-Perlman JA, Cruickshanks KJ, Palta M. Age-related



- maculopathy in a multiracial United States population: the National Health and Nutrition Examination Survey III. *Ophthalmology*. 1999;106(6):1056-1065.
33. Loprinzi PD, Addoh O. Predictive Validity of the American College of Cardiology/American Heart Association Pooled Cohort Equations in Predicting All-Cause and Cardiovascular Disease-Specific Mortality in a National Prospective Cohort Study of Adults in the United States. *Mayo Clin Proc*. 2016;91(6):763-769.
  34. McGuinness MB, Finger RP, Karahalios A, et al. Age-related macular degeneration and mortality: the Melbourne Collaborative Cohort Study. *Eye (Lond)*. 2017;31(9):1345-1357.
  35. Chakravarthy U, Wong TY, Fletcher A, et al. Clinical risk factors for age-related macular degeneration: a systematic review and meta-analysis. *BMC Ophthalmol*. 2010;10:31.
  36. Ryu SJ, Lee WJ, Tarver LB, et al. Depressive Symptoms and Quality of Life in Age-related Macular Degeneration Based on Korea National Health and Nutrition Examination Survey (KNHANES). *Korean J Ophthalmol*. 2017;31(5):412-423.
  37. Eisenberg-Guyot J, Prins SJ. Relational Social Class, Self-Rated Health, and Mortality in the United States. *Int J Health Serv*. 2020;50(1):7-20.
  38. NHANES Survey Methods and Analytic Guidelines. <https://www.cdc.gov/nchs/nhanes/analyticguidelines.aspx#analytic-guidelines>.
  39. Xin X, Sun Y, Li S, Xu H, Zhang D. AGE-RELATED MACULAR DEGENERATION AND THE RISK OF ALL-CAUSE AND CARDIOVASCULAR MORTALITY: A Meta-Analysis of Cohort Studies. *Retina*. 2018;38(3):497-507.
  40. McGuinness MB, Karahalios A, Finger RP, Guymer RH, Simpson JA. Age-Related Macular Degeneration and Mortality: A Systematic Review and Meta-Analysis. *Ophthalmic Epidemiol*. 2017;24(3):141-152.
  41. Snow KK, Seddon JM. Do age-related macular degeneration and cardiovascular disease share common antecedents? *Ophthalmic Epidemiol*. 1999;6(2):125-143.
  42. Kishan AU, Modjtahedi BS, Martins EN, Modjtahedi SP, Morse LS. Lipids and age-related macular degeneration. *Surv Ophthalmol*. 2011;56(3):195-213.
  43. Hanus J, Anderson C, Wang S. RPE necroptosis in response to oxidative stress and in AMD. *Ageing Res Rev*. 2015;24(Pt B):286-298.
  44. Wu J, Uchino M, Sastry SM, Schaumberg DA. Age-related macular degeneration and the incidence of cardiovascular disease: a systematic review and meta-analysis. *PLoS One*. 2014;9(3):e89600.
  45. Pennington KL, DeAngelis MM. Epidemiology of age-related macular degeneration (AMD): associations with cardiovascular disease phenotypes and lipid factors. *Eye Vis (Lond)*. 2016;3:34.
  46. Beaumont PE, Petocz P, Kang HK. Is there risk of stroke with aflibercept? *Ophthalmology*. 2014;121(1):e4.
  47. Kemp A, Preen DB, Morlet N, et al. Myocardial infarction after intravitreal vascular endothelial growth factor inhibitors: a whole population study. *Retina*. 2013;33(5):920-927.
  48. Choi S, Jahng WJ, Park SM, Jee D. Association of Age-Related Macular Degeneration on Alzheimer or Parkinson Disease: A Retrospective Cohort Study. *Am J Ophthalmol*. 2020;210:41-47.
  49. Seden D, Alime G, Kadir D, Serpil D, Levent T, Ozlem T. Is Alzheimer disease related to age-related macular degeneration? *Turk J Med Sci*. 2015;45(5):1115-1121.

50. Rong SS, Lee BY, Kuk AK, et al. Comorbidity of dementia and age-related macular degeneration calls for clinical awareness: a meta-analysis. *Br J Ophthalmol.* 2019;103(12):1777-1783.
51. Woo SJ, Park KH, Ahn J, et al. Cognitive impairment in age-related macular degeneration and geographic atrophy. *Ophthalmology.* 2012;119(10):2094-2101.
52. Kulmala J, Era P, Parssinen O, et al. Lowered vision as a risk factor for injurious accidents in older people. *Aging Clin Exp Res.* 2008;20(1):25-30.
53. Ivers RQ, Cumming RG, Mitchell P, Attebo K. Visual impairment and falls in older adults: the Blue Mountains Eye Study. *J Am Geriatr Soc.* 1998;46(1):58-64.
54. Coleman AL, Yu F, Ensrud KE, et al. Impact of age-related macular degeneration on vision-specific quality of life: Follow-up from the 10-year and 15-year visits of the Study of Osteoporotic Fractures. *Am J Ophthalmol.* 2010;150(5):683-691.
